# Supplementary material for: Comprehensive profiling of Platycodonis radix in different growing regions using liquid chromatography coupled with mass spectrometry: from metabolome and lipidome aspects
Source: Royal Society of Chemistry journal article supplement (doi:10.1039/d1ra08285j), 2022-01-01
Supplement: d1ra08285j1.pdf [file d1ra08285j1.pdf]

1

## Supplementary Materials

### 2 **Comprehensive Profiling of Platycodonis Radix in Different Growing Regions** 3 **Using Liquid Chromatography Coupled with Mass Spectrometry: from** 4 **Metabolome and Lipidome Aspects**

5 Weizhen Huang, ‡<sup>ab</sup> Lan Lan, ‡<sup>b</sup> Heng Zhou,<sup>b</sup> Jiajia Yuan,<sup>b</sup> Shui miao,<sup>b</sup> Xiuhong Mao,<sup>b</sup>  
6 Qing Hu <sup>b</sup> and Shen Ji <sup>\*b</sup>

7 *<sup>a</sup>School of Pharmacy, Fudan University, Shanghai, 201203, PR China*

8 *<sup>b</sup>NMPA Key Laboratory for Quality Control of Traditional Chinese Medicine, Shanghai*

9 *Institute for Food and Drug Control, Shanghai 201203, PR China*

10 \* Correspondence: jishen2021@126.com

11 ‡ These authors contributed equally to this work

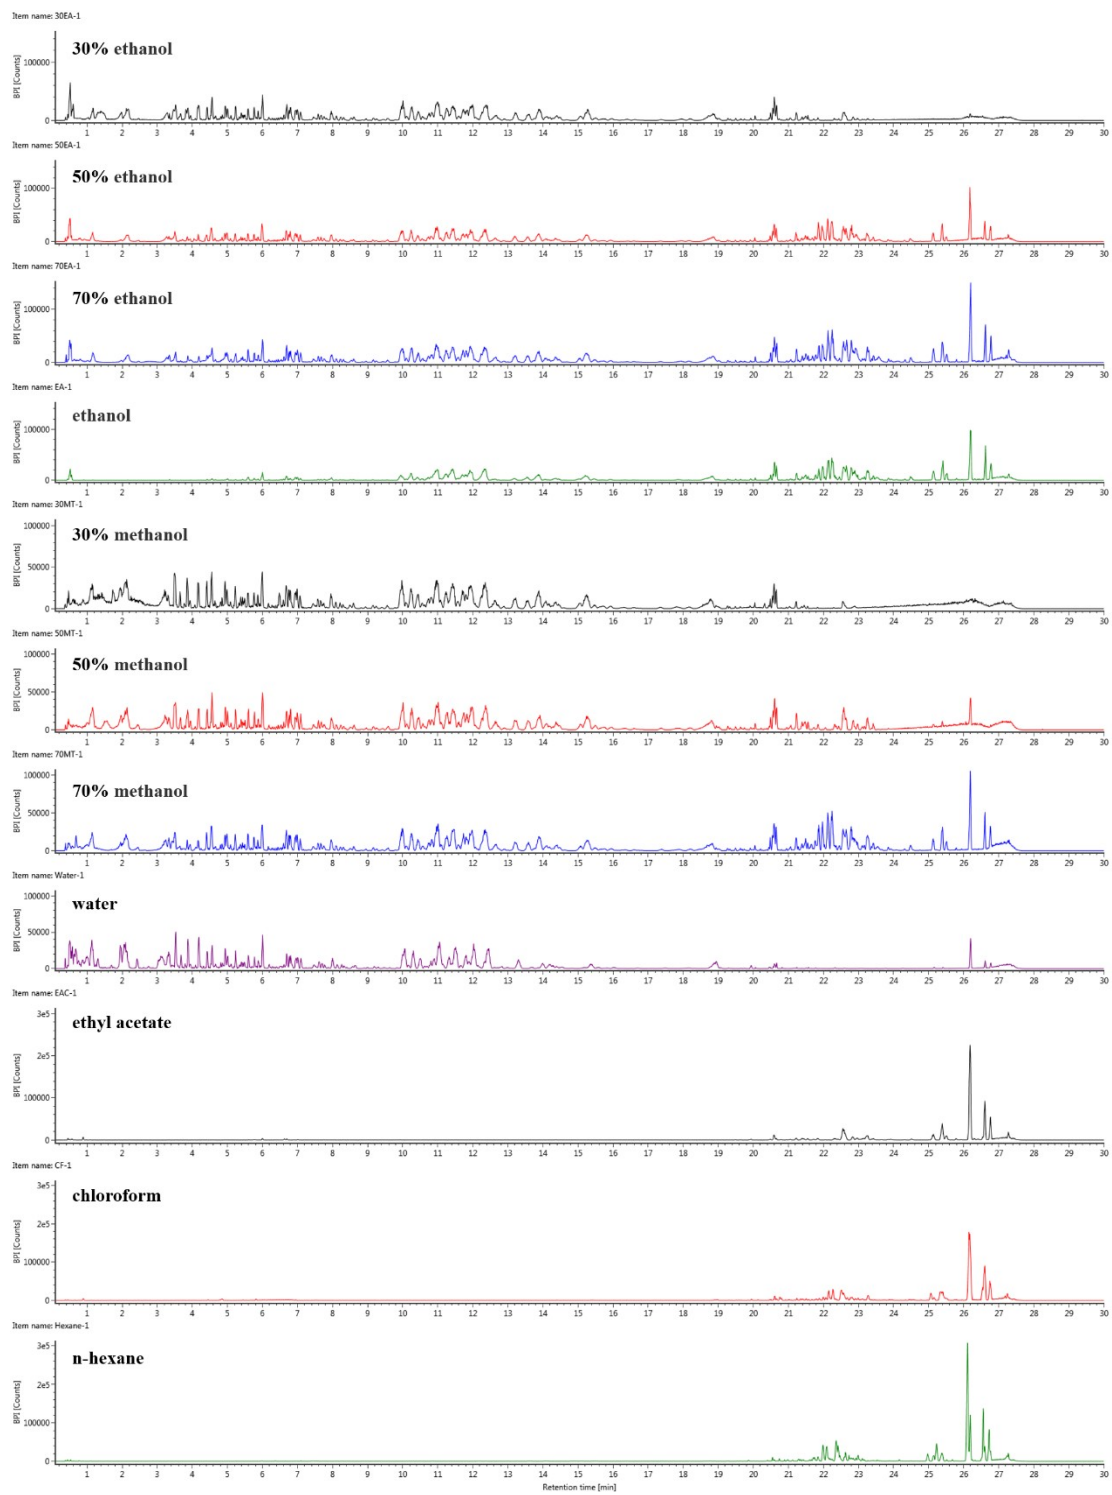

12

13 **Figure S1.** Representative chromatograms of different solvent extractions for  
 14 metabolome sample.

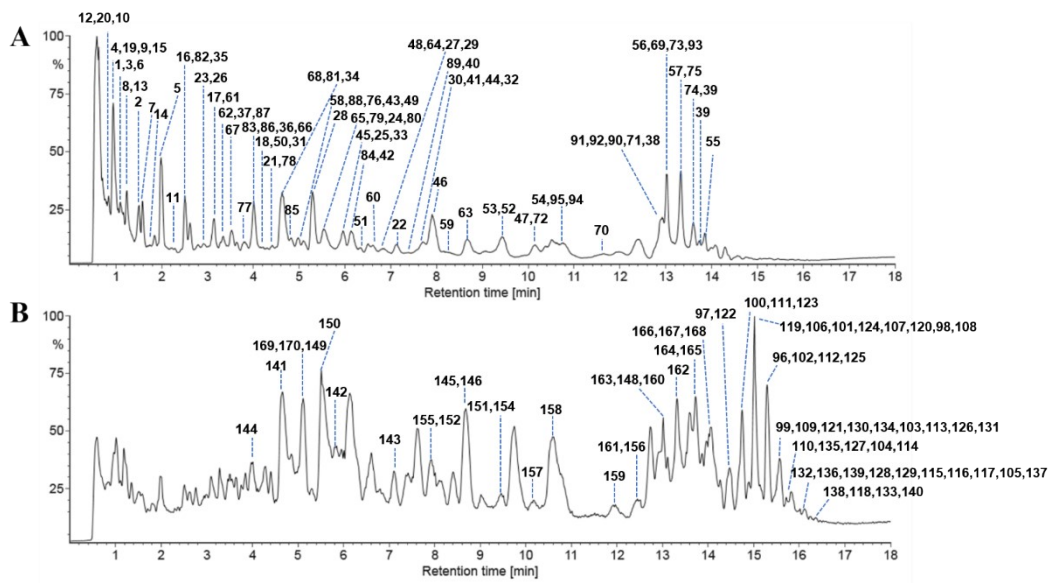

15

16 **Figure S2.** Representative chromatograms of lipid profiling via UPLC/IM-QTOF-  
 17 HDMS<sup>E</sup> analysis in negative (A) and positive (B) modes

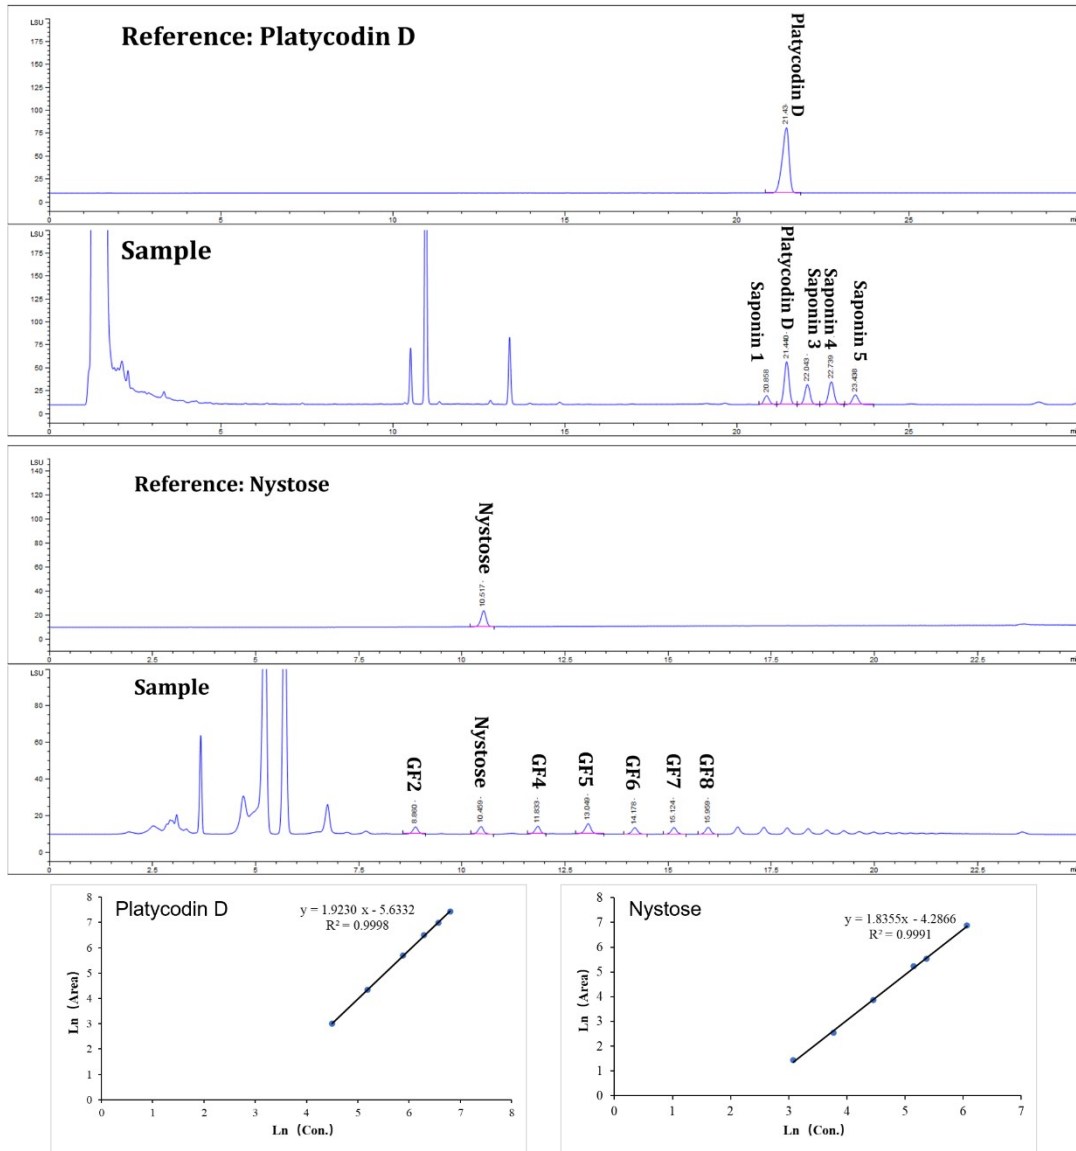

18

19 **Figure S3.** Representative chromatograms and linear calibration curves for assays on  
 20 total saponins and oligosaccharides.

**Table S1 Detailed information of the samples**

| NO.                                                                                 | Sample location                | Growth year | Date for handpicking      | Local weather      |
|-------------------------------------------------------------------------------------|--------------------------------|-------------|---------------------------|--------------------|
| AH1<br>AH2<br>AH3<br>AH4                                                            | Lixing, Taihe county           | 2-3 years   | 2020.10.23                | Sunny              |
| AH5<br>AH6<br>AH7<br>AH8                                                            | Lixing, Taihe county           | 2-3 years   | 2020.10.24                | Cloudy with breeze |
| AH9<br>AH10<br>AH11<br>AH12                                                         | Shuangmaio, Taihe county       | 2-3 years   | 2020.10.25                | Cloudy with breeze |
| NM1<br>NM2<br>NM3<br>NM4<br>NM5<br>NM6<br>NM7<br>NM8<br>NM9<br>NM10<br>NM11<br>NM12 | Harqin banner,<br>Chifeng city | 2-3 years   | 2020.09.16-<br>2020.09.17 | Cloudy to sunny    |

23 **Table 2** Lipid molecular species identified in *Platycodonis Radix*

| NO. | Lipid species    | Adduct                | Observed<br>m/z | Mass error<br>(ppm) | Formula    | Retention<br>time (min) |
|-----|------------------|-----------------------|-----------------|---------------------|------------|-------------------------|
| 1   | LPA 16:0         | [M-H] <sup>-</sup>    | 409.2361        | 0.13                | C19H39O7P  | 1.12                    |
| 2   | LPA 18:0         | [M-H] <sup>-</sup>    | 437.2673        | -0.1                | C21H43O7P  | 1.56                    |
| 3   | LPA 18:1         | [M-H] <sup>-</sup>    | 435.2512        | -1.21               | C21H41O7P  | 1.17                    |
| 4   | LPA 18:2         | [M-H] <sup>-</sup>    | 433.2358        | -0.64               | C21H39O7P  | 0.96                    |
| 5   | LPA 18:2         | [M-H] <sup>-</sup>    | 433.2363        | 0.43                | C21H39O7P  | 2.00                    |
| 6   | LPC 16:0/0:0     | [M+HCOO] <sup>-</sup> | 540.3308        | 0.22                | C24H50NO7P | 1.19                    |
| 7   | LPC 18:0/0:0     | [M+HCOO] <sup>-</sup> | 568.3622        | 0.33                | C26H54NO7P | 1.63                    |
| 8   | LPC 18:1/0:0     | [M+HCOO] <sup>-</sup> | 566.3454        | -1.76               | C26H52NO7P | 1.24                    |
| 9   | LPC 18:2/0:0     | [M+HCOO] <sup>-</sup> | 564.3303        | -0.64               | C26H50NO7P | 1.02                    |
| 10  | LPC 18:3         | [M+HCOO] <sup>-</sup> | 562.3149        | -0.29               | C26H48NO7P | 0.87                    |
| 11  | LPC 20:0/0:0     | [M+HCOO] <sup>-</sup> | 596.3928        | -0.87               | C28H58NO7P | 2.31                    |
| 12  | LPE 0:0/18:2     | [M-H] <sup>-</sup>    | 476.2786        | 0.41                | C23H44NO7P | 0.83                    |
| 13  | LPE 16:0/0:0     | [M-H] <sup>-</sup>    | 452.2785        | 0.6                 | C21H44NO7P | 1.24                    |
| 14  | LPE 18:0/0:0     | [M-H] <sup>-</sup>    | 480.3105        | 1.98                | C23H48NO7P | 1.72                    |
| 15  | LPE 18:2/0:0     | [M-H] <sup>-</sup>    | 476.2785        | -0.29               | C23H44NO7P | 1.06                    |
| 16  | LPE 20:0/0:0     | [M-H] <sup>-</sup>    | 508.3413        | 0.93                | C25H52NO7P | 2.46                    |
| 17  | LPE 22:0/0:0     | [M-H] <sup>-</sup>    | 536.3721        | -0.15               | C27H56NO7P | 3.25                    |
| 18  | LPE 24:0/0:0     | [M-H] <sup>-</sup>    | 564.4044        | 1.66                | C29H60NO7P | 4.21                    |
| 19  | LPI 16:0         | [M-H] <sup>-</sup>    | 571.2881        | -1.37               | C25H49O12P | 0.98                    |
| 20  | LPI 18:2         | [M-H] <sup>-</sup>    | 595.2883        | -0.93               | C27H49O12P | 0.86                    |
| 21  | PA 14:0/18:2     | [M-H] <sup>-</sup>    | 643.4417        | 0.34                | C35H65O8P  | 4.39                    |
| 22  | PA 16:0/18:1     | [M-H] <sup>-</sup>    | 673.4808        | -0.93               | C37H71O8P  | 7.14                    |
| 23  | PA 16:0/18:1(OH) | [M-H] <sup>-</sup>    | 685.4449        | 0.12                | C37H67O9P  | 2.95                    |
| 24  | PA 16:0/18:2     | [M-H] <sup>-</sup>    | 671.4661        | 0.53                | C37H69O8P  | 5.59                    |
| 25  | PA 16:0/18:2     | [M-H] <sup>-</sup>    | 671.4653        | -0.61               | C37H69O8P  | 5.94                    |
| 26  | PA 16:0/18:2(OH) | [M-H] <sup>-</sup>    | 687.4601        | -0.82               | C37H69O9P  | 3.01                    |
| 27  | PA 17:0/17:2     | [M-H] <sup>-</sup>    | 671.4655        | -0.34               | C37H69O8P  | 6.80                    |
| 28  | PA 17:1/15:0     | [M-H] <sup>-</sup>    | 645.4502        | 0.26                | C35H67O8P  | 5.43                    |
| 29  | PA 17:1/18:1     | [M-H] <sup>-</sup>    | 685.4812        | -0.3                | C38H71O8P  | 6.80                    |
| 30  | PA 18:0/18:2     | [M-H] <sup>-</sup>    | 699.4966        | -0.66               | C39H73O8P  | 7.60                    |
| 31  | PA 18:2/15:1     | [M-H] <sup>-</sup>    | 655.4341        | -0.51               | C36H65O8P  | 4.36                    |
| 32  | PA 18:2/18:0     | [M-H] <sup>-</sup>    | 699.4966        | -0.65               | C39H73O8P  | 7.75                    |
| 33  | PA 18:2/18:1     | [M-H] <sup>-</sup>    | 697.4813        | -0.18               | C39H71O8P  | 5.94                    |
| 34  | PA 18:2/18:2     | [M-H] <sup>-</sup>    | 695.4655        | -0.37               | C39H69O8P  | 4.69                    |
| 35  | PA 18:2/18:2(OH) | [M-H] <sup>-</sup>    | 711.4402        | 0.38                | C39H69O9P  | 2.52                    |
| 36  | PA 18:2/18:3     | [M-H] <sup>-</sup>    | 693.4496        | -0.47               | C39H67O8P  | 4.02                    |
| 37  | PA 18:3/18:3     | [M-H] <sup>-</sup>    | 691.4347        | 0.34                | C39H65O8P  | 3.42                    |
| 38  | PA 22:0/18:2     | [M-H] <sup>-</sup>    | 755.5591        | -0.65               | C43H81O8P  | 12.89                   |
| 39  | PA 24:0/18:2     | [M-H] <sup>-</sup>    | 783.5902        | -0.9                | C45H85O8P  | 13.71                   |
| 40  | PC 16:0/16:0     | [M+HCOO] <sup>-</sup> | 778.5598        | -0.76               | C40H80NO8P | 7.39                    |
| 41  | PC 16:0/18:1     | [M+HCOO] <sup>-</sup> | 804.5753        | -0.86               | C42H82NO8P | 7.62                    |

|    |                   |                       |          |       |            |       |
|----|-------------------|-----------------------|----------|-------|------------|-------|
| 42 | PC 16:0/18:2      | [M+HCOO] <sup>-</sup> | 802.5599 | -0.56 | C42H80NO8P | 6.15  |
| 43 | PC 16:0/18:3      | [M+HCOO] <sup>-</sup> | 800.5448 | 0.11  | C42H78NO8P | 5.10  |
| 44 | PC 17:0_18:2      | [M+HCOO] <sup>-</sup> | 816.5746 | -1.72 | C43H82NO8P | 7.70  |
| 45 | PC 17:1_18:2      | [M+HCOO] <sup>-</sup> | 814.5605 | 0.2   | C43H80NO8P | 5.91  |
| 46 | PC 18:0/18:2      | [M+HCOO] <sup>-</sup> | 830.5907 | -1.17 | C44H84NO8P | 8.14  |
| 47 | PC 18:0_18:1      | [M+HCOO] <sup>-</sup> | 832.6057 | -1.99 | C44H86NO8P | 10.07 |
| 48 | PC 18:0_18:3      | [M+HCOO] <sup>-</sup> | 828.5755 | -0.67 | C44H82NO8P | 6.72  |
| 49 | PC 18:2/18:2      | [M+HCOO] <sup>-</sup> | 826.5676 | -0.5  | C44H80NO8P | 5.12  |
| 50 | PC 18:2/18:3      | [M+HCOO] <sup>-</sup> | 824.5440 | -0.85 | C44H78NO8P | 4.29  |
| 51 | PC 18:2_18:1      | [M+HCOO] <sup>-</sup> | 828.5766 | -0.9  | C44H82NO8P | 6.30  |
| 52 | PC 18:2_21:1      | [M+HCOO] <sup>-</sup> | 870.6224 | -0.68 | C47H88NO8P | 9.38  |
| 53 | PC 19:0_18:2      | [M+HCOO] <sup>-</sup> | 844.6060 | -1.54 | C45H86NO8P | 9.33  |
| 54 | PC 20:0/18:2      | [M+HCOO] <sup>-</sup> | 858.6218 | -1.31 | C46H88NO8P | 10.73 |
| 55 | PC 20:0_18:1      | [M+HCOO] <sup>-</sup> | 860.6385 | -0.18 | C46H90NO8P | 13.84 |
| 56 | PC 22:0_18:2      | [M+HCOO] <sup>-</sup> | 886.6543 | 0.09  | C48H92NO8P | 12.99 |
| 57 | PC 22:0_19:2      | [M+HCOO] <sup>-</sup> | 900.6772 | 1.74  | C49H94NO8P | 13.28 |
| 58 | PE 15:1/18:2      | [M-H] <sup>-</sup>    | 698.4839 | -0.87 | C38H70NO8P | 4.98  |
| 59 | PE 16:0/18:1      | [M-H] <sup>-</sup>    | 716.5227 | -1.24 | C39H76NO8P | 8.25  |
| 60 | PE 16:0/18:2      | [M-H] <sup>-</sup>    | 714.5075 | -0.73 | C39H74NO8P | 6.64  |
| 61 | PE 16:0/18:2(OH)  | [M-H] <sup>-</sup>    | 730.5014 | -2    | C39H74NO9P | 3.27  |
| 62 | PE 16:0/18:3(OH)  | [M-H] <sup>-</sup>    | 728.4861 | 0.34  | C39H72NO9P | 3.31  |
| 63 | PE 18:0/18:2      | [M-H] <sup>-</sup>    | 742.5386 | -0.89 | C41H78NO8P | 8.77  |
| 64 | PE 18:1/18:2      | [M-H] <sup>-</sup>    | 740.5234 | -0.39 | C41H76NO8P | 6.78  |
| 65 | PE 18:1/18:3      | [M-H] <sup>-</sup>    | 738.5079 | -0.1  | C41H74NO8P | 5.49  |
| 66 | PE 18:2/16:0      | [M-H] <sup>-</sup>    | 714.5071 | -1.1  | C39H74NO8P | 4.07  |
| 67 | PE 18:2/18:2      | [M-H] <sup>-</sup>    | 738.5079 | -1.47 | C41H74NO8P | 3.53  |
| 68 | PE 18:3/18:2      | [M-H] <sup>-</sup>    | 736.4926 | 0.38  | C41H72NO8P | 4.57  |
| 69 | PE 18:3/24:0      | [M-H] <sup>-</sup>    | 870.6261 | 3.61  | C47H88NO8P | 13.05 |
| 70 | PE 20:0/18:2      | [M-H] <sup>-</sup>    | 770.5709 | 0.49  | C43H82NO8P | 11.59 |
| 71 | PE 20:0/20:0      | [M-H] <sup>-</sup>    | 802.6324 | -0.92 | C45H90NO8P | 12.86 |
| 72 | PE 21:1_18:2      | [M-H] <sup>-</sup>    | 782.5703 | -0.24 | C44H82NO8P | 10.11 |
| 73 | PE 22:0/18:2      | [M-H] <sup>-</sup>    | 798.6007 | -1.48 | C45H86NO8P | 13.15 |
| 74 | PE 24:0/18:2      | [M-H] <sup>-</sup>    | 826.6326 | -0.6  | C47H90NO8P | 13.67 |
| 75 | PE 25:1/18:2      | [M-H] <sup>-</sup>    | 838.6320 | -1.34 | C48H89NO8P | 13.38 |
| 76 | PG 16:0/18:2      | [M-H] <sup>-</sup>    | 745.5019 | -1.08 | C40H75O10P | 5.03  |
| 77 | PG 18:2/18:2      | [M-H] <sup>-</sup>    | 769.5014 | -1.52 | C42H75O10P | 3.82  |
| 78 | PG 18:2/18:2      | [M-H] <sup>-</sup>    | 769.5025 | -0.05 | C42H75O10P | 4.45  |
| 79 | PI 16:0/16:0      | [M-H] <sup>-</sup>    | 809.5185 | -0.08 | C41H79O13P | 5.55  |
| 80 | PI 16:0/18:1      | [M-H] <sup>-</sup>    | 835.5343 | 0.35  | C43H81O13P | 5.75  |
| 81 | PI 16:0/18:2      | [M-H] <sup>-</sup>    | 833.5183 | -0.28 | C43H79O13P | 4.68  |
| 82 | PI 16:0/18:2 (OH) | [M-H] <sup>-</sup>    | 849.5119 | -1.19 | C43H80O14P | 2.50  |
| 83 | PI 16:0/18:3      | [M-H] <sup>-</sup>    | 831.5019 | -1.23 | C43H76O13P | 3.98  |
| 84 | PI 18:0/18:2      | [M-H] <sup>-</sup>    | 861.5494 | -0.9  | C45H83O13P | 6.12  |
| 85 | PI 18:0/18:3      | [M-H] <sup>-</sup>    | 859.5340 | -0.78 | C45H81O13P | 4.83  |

|     |                   |                                   |          |       |             |       |
|-----|-------------------|-----------------------------------|----------|-------|-------------|-------|
| 86  | PI 18:1/18:3      | [M-H] <sup>-</sup>                | 857.5175 | -1.26 | C45H79O13P  | 4.01  |
| 87  | PI 18:3/18:2      | [M-H] <sup>-</sup>                | 855.5017 | -1.41 | C45H77O13P  | 3.43  |
| 88  | PMeOH 15:0/17:2   | [M-H] <sup>-</sup>                | 657.4499 | -0.25 | C36H67O8P   | 5.01  |
| 89  | PMeOH 18:0/18:2   | [M-H] <sup>-</sup>                | 713.5200 | -0.78 | C40H75O8P   | 7.38  |
| 90  | PMeOH 21:0/18:2   | [M-H] <sup>-</sup>                | 755.5591 | -1.1  | C43H81O8P   | 12.85 |
| 91  | PMeOH 22:0/18:2   | [M-H] <sup>-</sup>                | 769.5750 | -0.33 | C44H83O8P   | 12.73 |
| 92  | PMeOH 23:1/18:2   | [M-H] <sup>-</sup>                | 781.5747 | -0.76 | C45H83O8P   | 12.82 |
| 93  | PMeOH 24:1/18:2   | [M-H] <sup>-</sup>                | 795.5901 | -0.16 | C46H85O8P   | 13.15 |
| 94  | PS 22:0/18:2      | [M-H] <sup>-</sup>                | 842.5911 | -0.61 | C46H86NO10P | 10.99 |
| 95  | PS 24:1/18:2      | [M-H] <sup>-</sup>                | 868.6067 | -0.76 | C48H88NO10P | 10.87 |
| 96  | TG 16:1/16:1/16:0 | [M+NH <sub>4</sub> ] <sup>+</sup> | 820.7365 | -2.86 | C51H94O6    | 15.22 |
| 97  | TG 16:0/16:0/18:3 | [M+H] <sup>+</sup>                | 829.7268 | -1.37 | C53H96O6    | 14.27 |
| 98  | TG 14:0/18:2/17:1 | [M+NH <sub>4</sub> ] <sup>+</sup> | 832.7368 | -2.46 | C52H94O6    | 15.19 |
| 99  | TG 16:0/17:0/18:2 | [M+NH <sub>4</sub> ] <sup>+</sup> | 834.7540 | -0.64 | C52H96O6    | 15.42 |
| 100 | TG 16:1/18:2/16:2 | [M+NH <sub>4</sub> ] <sup>+</sup> | 842.7228 | -0.53 | C53H92O6    | 14.69 |
| 101 | TG 16:1/16:1/18:2 | [M+NH <sub>4</sub> ] <sup>+</sup> | 844.7390 | 0.16  | C53H94O6    | 14.95 |
| 102 | TG 18:2/14:0/18:1 | [M+NH <sub>4</sub> ] <sup>+</sup> | 846.7522 | -2.68 | C53H96O6    | 15.24 |
| 103 | TG 16:0/18:2/16:0 | [M+NH <sub>4</sub> ] <sup>+</sup> | 848.7686 | -1.87 | C53H98O6    | 15.56 |
| 104 | TG 16:0/18:1/16:0 | [M+NH <sub>4</sub> ] <sup>+</sup> | 850.7840 | -2.19 | C53H100O6   | 15.82 |
| 105 | TG 16:0/18:0/16:0 | [M+NH <sub>4</sub> ] <sup>+</sup> | 852.8003 | -1.35 | C53H102O6   | 16.11 |
| 106 | TG 16:1/17:2/18:2 | [M+NH <sub>4</sub> ] <sup>+</sup> | 856.7372 | -1.99 | C54H94O6    | 14.90 |
| 107 | TG 16:1/17:1/18:2 | [M+NH <sub>4</sub> ] <sup>+</sup> | 858.7522 | -2.76 | C54H96O6    | 15.15 |
| 108 | TG 16:1/16:0/19:3 | [M+NH <sub>4</sub> ] <sup>+</sup> | 858.7526 | -2.46 | C54H96O6    | 15.19 |
| 109 | TG 16:0/17:1/18:2 | [M+NH <sub>4</sub> ] <sup>+</sup> | 860.7689 | -1.43 | C54H98O6    | 15.44 |
| 110 | TG 16:0/17:0/18:2 | [M+NH <sub>4</sub> ] <sup>+</sup> | 862.7851 | -0.8  | C54H100O6   | 15.71 |
| 111 | TG 18:2/16:1/18:3 | [M+NH <sub>4</sub> ] <sup>+</sup> | 868.7365 | -2.7  | C55H94O6    | 14.70 |
| 112 | TG 18:2/18:2/16:0 | [M+NH <sub>4</sub> ] <sup>+</sup> | 872.7656 | -2.93 | C55H98O6    | 15.30 |
| 113 | TG 18:1/18:2/16:0 | [M+NH <sub>4</sub> ] <sup>+</sup> | 874.7845 | -2.13 | C55H100O6   | 15.56 |
| 114 | TG 18:1/18:1/16:0 | [M+NH <sub>4</sub> ] <sup>+</sup> | 876.7993 | -2.49 | C55H102O6   | 15.83 |
| 115 | TG 16:0/16:0/20:1 | [M+NH <sub>4</sub> ] <sup>+</sup> | 878.8157 | -1.62 | C55H104O6   | 16.10 |
| 116 | TG 18:1/18:0/16:0 | [M+NH <sub>4</sub> ] <sup>+</sup> | 878.8157 | -1.62 | C55H104O6   | 16.10 |
| 117 | TG 18:0/18:0/16:1 | [M+NH <sub>4</sub> ] <sup>+</sup> | 878.8157 | -1.62 | C55H104O6   | 16.10 |
| 118 | TG 18:0/18:0/16:0 | [M+NH <sub>4</sub> ] <sup>+</sup> | 880.8303 | -2.8  | C55H106O6   | 16.37 |
| 119 | TG 18:2/15:1/20:3 | [M+NH <sub>4</sub> ] <sup>+</sup> | 882.7527 | -2.05 | C56H96O6    | 14.88 |
| 120 | TG 18:2/15:0/20:3 | [M+NH <sub>4</sub> ] <sup>+</sup> | 884.7676 | -2.96 | C56H98O6    | 15.17 |
| 121 | TG 18:1/15:0/20:3 | [M+NH <sub>4</sub> ] <sup>+</sup> | 886.7838 | -2.25 | C56H100O6   | 15.45 |
| 122 | TG 18:3/18:2/18:3 | [M+NH <sub>4</sub> ] <sup>+</sup> | 892.7361 | -3.09 | C57H94O6    | 14.48 |
| 123 | TG 18:2/18:2/18:3 | [M+NH <sub>4</sub> ] <sup>+</sup> | 894.7528 | -1.96 | C57H96O6    | 14.75 |
| 124 | TG 18:2/18:2/18:2 | [M+NH <sub>4</sub> ] <sup>+</sup> | 896.7682 | -2.16 | C57H98O6    | 15.03 |
| 125 | TG 20:3/16:1/18:1 | [M+NH <sub>4</sub> ] <sup>+</sup> | 898.7829 | -3.23 | C57H100O6   | 15.30 |
| 126 | TG 18:1/18:1/18:2 | [M+NH <sub>4</sub> ] <sup>+</sup> | 900.7998 | -1.18 | C57H102O6   | 15.60 |
| 127 | TG 18:1/18:1/18:1 | [M+NH <sub>4</sub> ] <sup>+</sup> | 902.8150 | -2.3  | C57H104O6   | 15.81 |



|     |                    |                                   |          |       |           |       |
|-----|--------------------|-----------------------------------|----------|-------|-----------|-------|
| 128 | TG 18:1/18:1/18:0  | [M+NH <sub>4</sub> ] <sup>+</sup> | 904.8310 | -1.96 | C57H106O6 | 16.09 |
| 129 | TG 18:0/18:0/18:2  | [M+NH <sub>4</sub> ] <sup>+</sup> | 904.8310 | -1.96 | C57H106O6 | 16.09 |
| 130 | TG 18:2/19:1/18:2  | [M+NH <sub>4</sub> ] <sup>+</sup> | 910.7999 | -1.73 | C58H102O6 | 15.45 |
| 131 | TG 18:2/20:1/18:2  | [M+NH <sub>4</sub> ] <sup>+</sup> | 926.8157 | -1.56 | C59H104O6 | 15.60 |
| 132 | TG 20:0/18:2/18:2  | [M+NH <sub>4</sub> ] <sup>+</sup> | 928.8305 | -2.48 | C59H106O6 | 15.88 |
| 133 | TG 22:0/16:0/18:2  | [M+NH <sub>4</sub> ] <sup>+</sup> | 932.8598 | -4.53 | C59H110O6 | 16.37 |
| 134 | TG 21:1/18:2/18:3  | [M+NH <sub>4</sub> ] <sup>+</sup> | 938.8150 | -2.28 | C60H104O6 | 15.49 |
| 135 | TG 18:2/21:1/18:2  | [M+NH <sub>4</sub> ] <sup>+</sup> | 940.8312 | -1.62 | C60H106O6 | 15.73 |
| 136 | TG 22:1/18:2/18:2  | [M+NH <sub>4</sub> ] <sup>+</sup> | 954.8461 | -2.44 | C61H108O6 | 15.90 |
| 137 | TG 22:0/18:2/18:2  | [M+NH <sub>4</sub> ] <sup>+</sup> | 956.8625 | -1.61 | C61H110O6 | 16.15 |
| 138 | TG 18:2/22:0/18:1  | [M+NH <sub>4</sub> ] <sup>+</sup> | 958.8768 | -3.07 | C61H112O6 | 16.35 |
| 139 | TG 18:2/21:1/20:2  | [M+NH <sub>4</sub> ] <sup>+</sup> | 968.8612 | -2.14 | C62H110O6 | 15.99 |
| 140 | TG 18:2/18:2/24:0  | [M+NH <sub>4</sub> ] <sup>+</sup> | 984.8915 | -3.93 | C63H114O6 | 16.40 |
| 141 | DG 18:3/16:0       | [M+H] <sup>+</sup>                | 591.4970 | -2.23 | C37H66O5  | 4.76  |
| 142 | DG 18:3/18:3       | [M+H] <sup>+</sup>                | 613.4819 | -1.23 | C39H64O5  | 5.86  |
| 143 | DG 18:3/18:2       | [M+H] <sup>+</sup>                | 615.4971 | -1.94 | C39H66O5  | 7.11  |
| 144 | DG 18:3/18:2       | [M+H] <sup>+</sup>                | 615.4973 | -1.58 | C39H66O5  | 4.02  |
| 145 | DG 18:2/18:2       | [M+H] <sup>+</sup>                | 617.5127 | -1.98 | C39H68O5  | 8.68  |
| 146 | DG 18:1/18:3       | [M+H] <sup>+</sup>                | 617.5127 | -1.98 | C39H68O5  | 8.68  |
| 147 | DG 18:2/18:1       | [M+H] <sup>+</sup>                | 619.5289 | -1.18 | C39H70O5  | 10.83 |
| 148 | DG 18:2/18:0       | [M+H] <sup>+</sup>                | 621.5430 | -3.57 | C39H72O5  | 12.97 |
| 149 | Cer d18:2/n16:1    | [M+H] <sup>+</sup>                | 534.4872 | -1.69 | C34H63NO3 | 4.98  |
| 150 | Cer d18:1/h16:0    | [M+H] <sup>+</sup>                | 554.5130 | -2.25 | C34H67NO4 | 5.46  |
| 151 | Cer t18:1/h20:0    | [M+H] <sup>+</sup>                | 626.5718 | -0.04 | C38H75NO5 | 9.35  |
| 152 | Cer t18:1/n22:2    | [M+H] <sup>+</sup>                | 634.5759 | -0.95 | C40H75NO4 | 7.93  |
| 153 | Cer t18:1/h21:0    | [M+H] <sup>+</sup>                | 640.5864 | -1.6  | C39H77NO5 | 10.80 |
| 154 | Cer t18:1/h22:1    | [M+H] <sup>+</sup>                | 652.5863 | 2.2   | C40H77NO5 | 9.45  |
| 155 | Cer t18:1/h22:1    | [M+H] <sup>+</sup>                | 652.5868 | 2.3   | C40H77NO5 | 7.92  |
| 156 | Cer t18:1/h22:0    | [M+H] <sup>+</sup>                | 654.6020 | -1.61 | C40H79NO5 | 12.45 |
| 157 | Cer t18:1/h22:0    | [M+H] <sup>+</sup>                | 654.6020 | -1.69 | C40H79NO5 | 10.17 |
| 158 | Cer t18:1/h22:0    | [M+H] <sup>+</sup>                | 654.6021 | -1.51 | C40H79NO5 | 10.46 |
| 159 | Cer t18:1/h23:0    | [M+H] <sup>+</sup>                | 668.6176 | -1.7  | C41H81NO5 | 11.99 |
| 160 | Cer t18:1/h23:0    | [M+H] <sup>+</sup>                | 668.6179 | -1.25 | C41H81NO5 | 13.04 |
| 161 | Cer t18:1/h24:1    | [M+H] <sup>+</sup>                | 680.6177 | -1.06 | C42H81NO5 | 12.39 |
| 162 | Cer t18:1/h24:0    | [M+H] <sup>+</sup>                | 682.6334 | -1.44 | C42H83NO5 | 13.34 |
| 163 | Cer t18:1/h24:0    | [M+H] <sup>+</sup>                | 682.6336 | -1.12 | C42H83NO5 | 12.91 |
| 164 | Cer t18:0/h24:0    | [M+H] <sup>+</sup>                | 684.6491 | -1.46 | C42H85NO5 | 13.60 |
| 165 | Cer t18:1/h25:0    | [M+H] <sup>+</sup>                | 696.6492 | -1.2  | C43H85NO5 | 13.60 |
| 166 | Cer t18:1/h26:0    | [M+H] <sup>+</sup>                | 710.6652 | -0.96 | C44H87NO5 | 13.86 |
| 167 | Cer t18:0/h26:0    | [M+H] <sup>+</sup>                | 712.6804 | -1.39 | C44H89NO5 | 14.10 |
| 168 | Cer t18:1/h27:0    | [M+H] <sup>+</sup>                | 724.6802 | -1.63 | C45H89NO5 | 14.10 |
| 169 | HexCer d18:3/n16:0 | [M+H] <sup>+</sup>                | 696.5394 | 1.24  | C40H73NO8 | 4.84  |
| 170 | HexCer d18:3/n16:0 | [M+H] <sup>+</sup>                | 696.5399 | 1.95  | C40H73NO8 | 4.97  |

24 LPA: Lysosphosphatidic acid; LPC: Lysophosphatidylcholine; LPE:  
25 Lysophosphatidylethanolamine; LPI: Lysophosphatidylinositol; PA: Phosphatidic  
26 acid; PC: Phosphatidylcholine; PE: Phosphatidylethanolamine; PG:  
27 Phosphatidylglycerol; PI: Phosphatidylinositol; PMeOH: Phosphatidylmethanol; PS:  
28 Phosphatidylinositol; TG: Triacylglycerol; DG: Diacylglycerol; Cer: Ceramide;  
29 HexCer: Hexosylceramide.
